# Supplementary material
Source: MDPI journal article supplement (https://www.mdpi.com/2673-4079/4/1/1)
Supplement: s1 [file s1]

# Recovery of lac resin from the aqueous effluent of shellac industry

Gaurav Badhani <sup>1,2</sup>, Shruti Yadav <sup>2</sup>, Elen Reji <sup>2</sup> and Subbarayappa Adimurthy <sup>1,2\*</sup>

<sup>1</sup> Academy of Scientific & Innovative Research (AcSIR), Ghaziabad, 201002, India

<sup>2</sup> CSIR–Central Salt & Marine Chemicals Research Institute, G. B. Marg, Bhavnagar-364 002. Gujarat, India

\* Correspondence: [adimurthy@csmcri.res.in](mailto:adimurthy@csmcri.res.in)

**Figure S1.  $^{13}\text{C}$ -NMR of (industrial grade & recovered) lac resin**

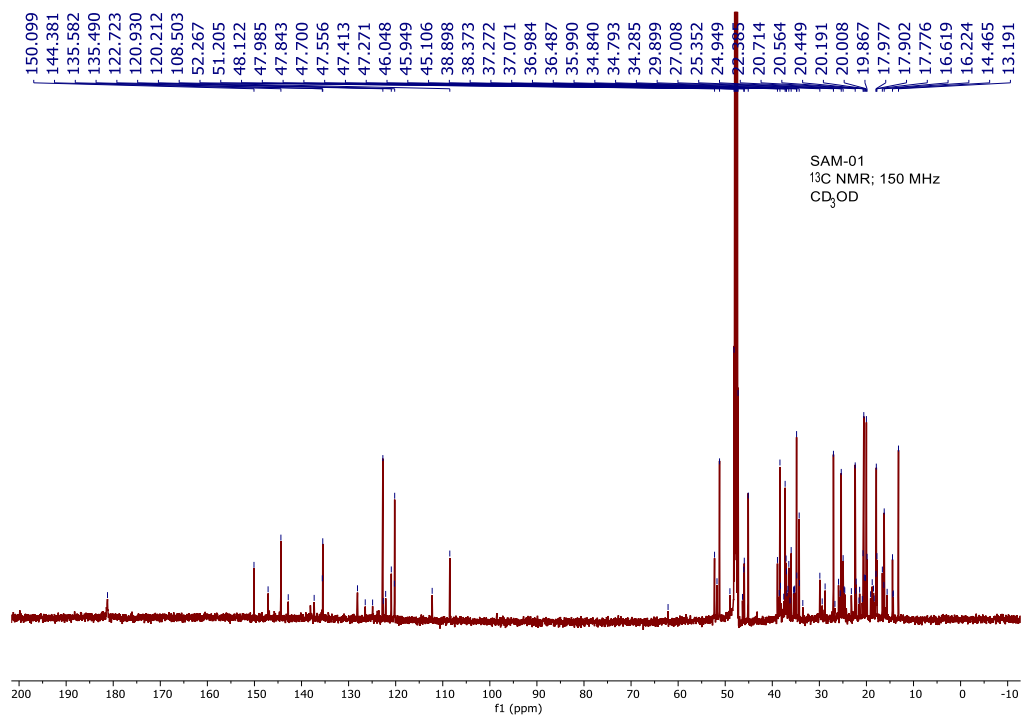

**$^{13}\text{C}$  NMR of industrial grade lac resin**

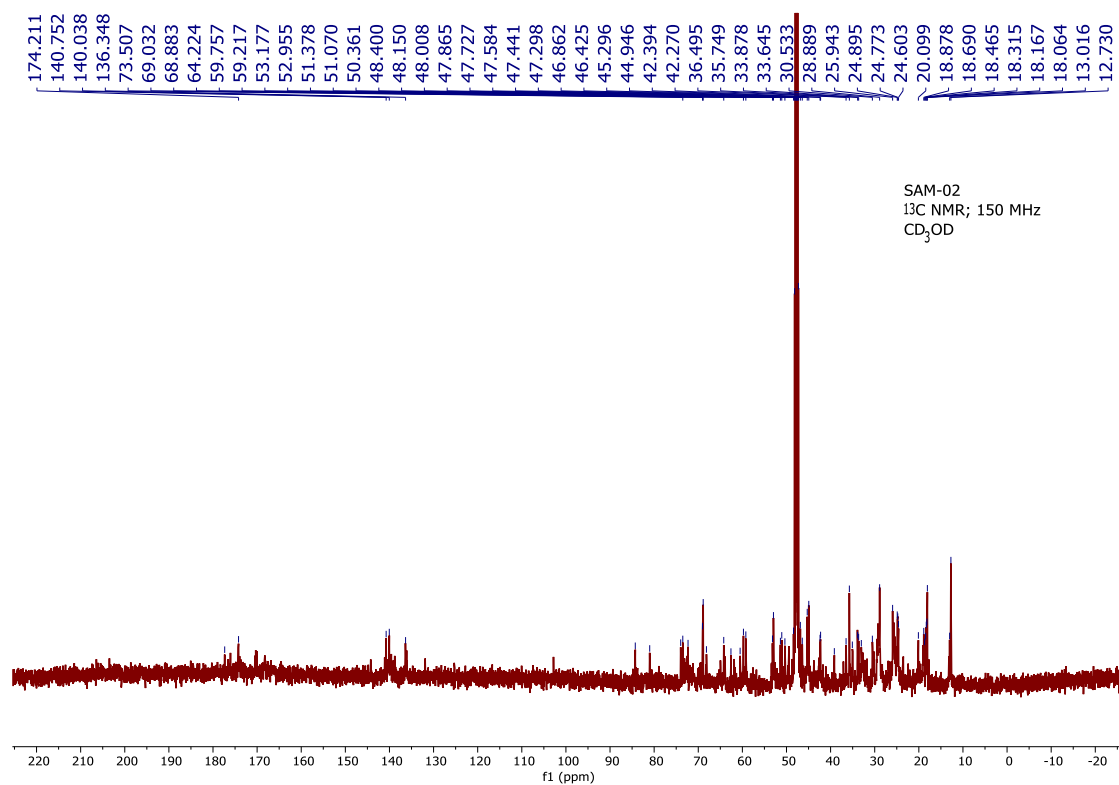

**$^{13}\text{C}$  NMR of recovered lac resin**

**Figure S2. Different forms of lac resin**

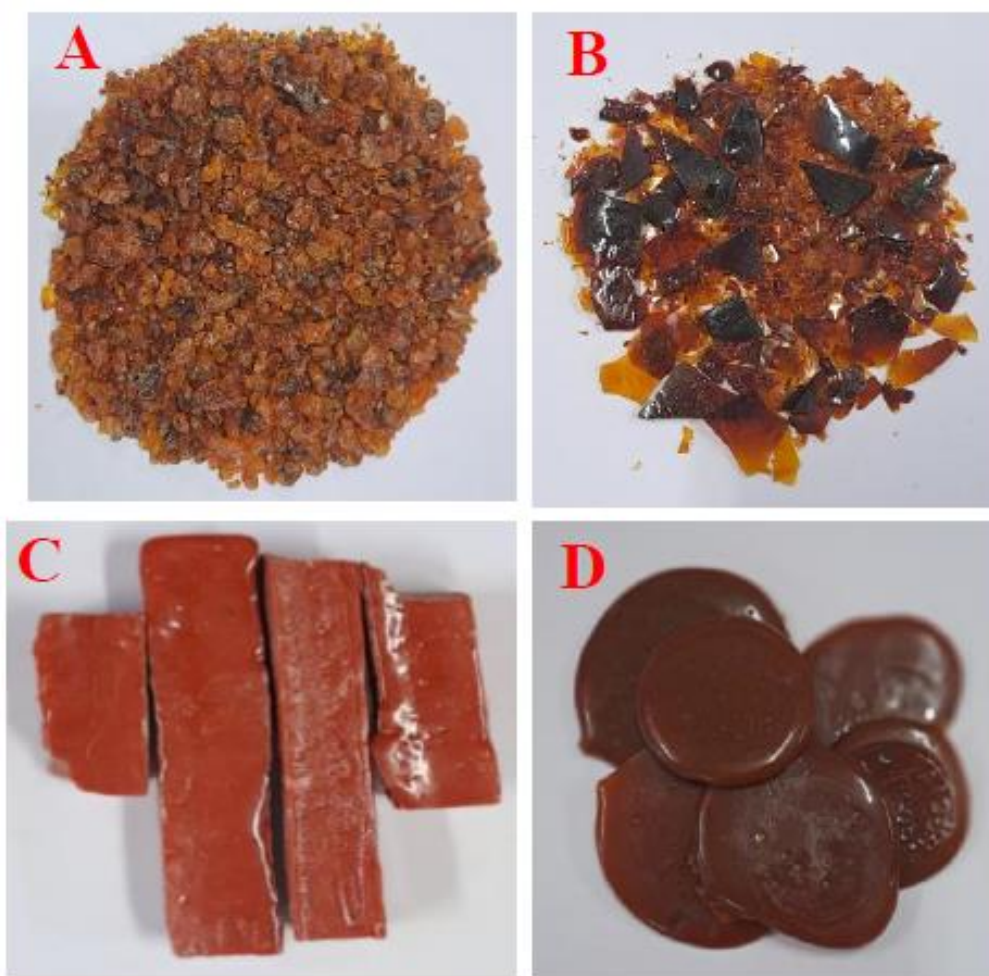

A) Standard industrial lac resin; B) Lac resin recovered from alkaline aq. effluent  
C) and D) Lac resin molded different shapes (Rods and Buttons) for diverse applications.
